# Supplementary material
Source: Springer Nature journal article supplement (https://www.springermedizin.de/resource/supplementary/12985_2009_682_MOESM4_ESM.pdf/9608260)

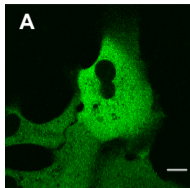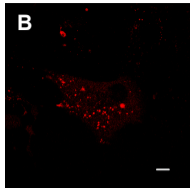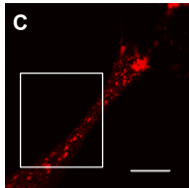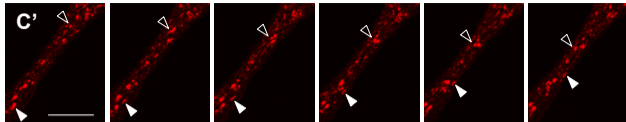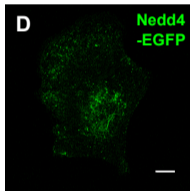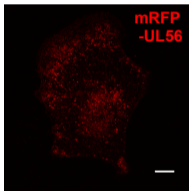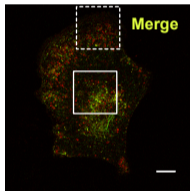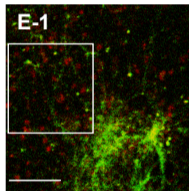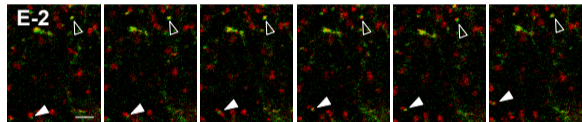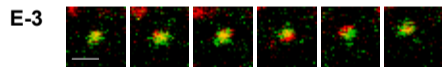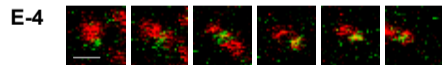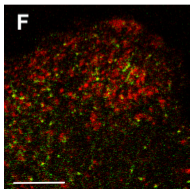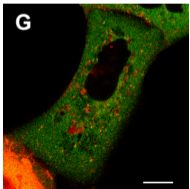

Supplement: MOESM4 [file 9608260]
